# Supplementary material
Source: HighWire-hosted journal article supplement (https://bmjmedicine.bmj.com/content/2/1/e000579)
Supplement: inline-supplementary-material-1 [file inline-supplementary-material-1.pdf]

Supplementary table S1: Median duration of neonatal admission in days by gestational age, time period and survival status for births at 22<sup>+0</sup> to 24<sup>+6</sup> weeks gestational age

| Gestation (weeks)                                           | 22            |                    |               |                    | 23            |                    |               |                    | 24            |                    |                |                  |
|-------------------------------------------------------------|---------------|--------------------|---------------|--------------------|---------------|--------------------|---------------|--------------------|---------------|--------------------|----------------|------------------|
| Time period                                                 | 2018-2019     |                    | 2020-2021     |                    | 2018-2019     |                    | 2020-2021     |                    | 2018-2019     |                    | 2020-2021      |                  |
| Survival                                                    | Died          | Survived           | Died          | Survived           | Died          | Survived           | Died          | Survived           | Died          | Survived           | Died           | Survived         |
| Median length of admission in days<br>(Interquartile range) | 3<br>(1 – 14) | 153<br>(142 – 160) | 4<br>(2 – 11) | 154<br>(132 – 169) | 7<br>(2 – 17) | 135<br>(116 – 155) | 6<br>(2 – 18) | 136<br>(120 – 159) | 9<br>(3 – 29) | 120<br>(105 – 141) | 10<br>(4 – 27) | 119<br>(104-137) |
| Total care days                                             | 497           | 2038               | 967           | 5873               | 4432          | 32380              | 4474          | 31590              | 6268          | 64887              | 4291           | 59671            |
